# Supplementary material for: A Single-Institute Experience with C-ros Oncogene 1 Translocation in Non-Small Cell Lung Cancers in Taiwan
Source: MDPI journal article supplement (doi:10.3390/ijms23105789), 2022-05-21
Supplement: s1 [file s1]

## Overall Survival of retrospective 100 cases

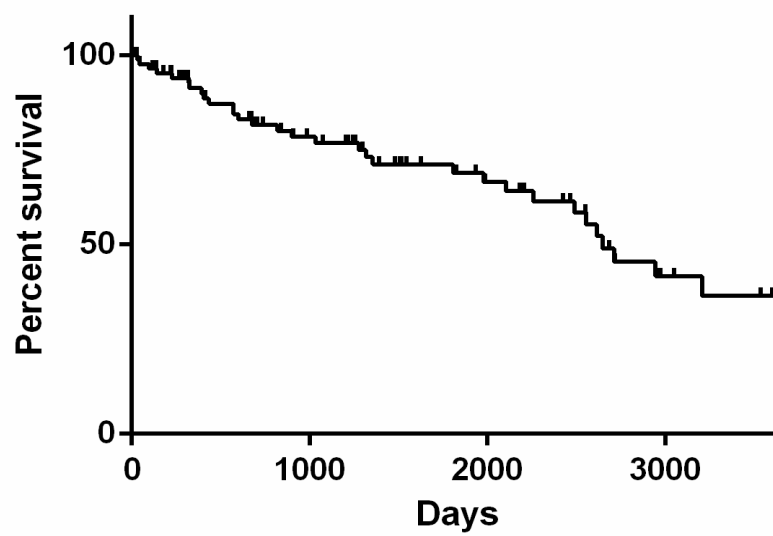

**Supplementary Figure S1.** Overall survival of the 100 cases in pre-crizotinib period. The overall 1-year, 3-year, 5-year and 10-year survival values of the 100 NSCLCs are 91%, 77%, 69% and 36%.
